# Supplementary material for: Effects of Mitochondrial Transplantation on Transcriptomics in a Polymicrobial Sepsis Model
Source: MDPI journal article supplement (doi:10.3390/ijms242015326), 2023-10-18
Supplement: s1 [file s1]

## Supplementary Materials

# Effects of Mitochondrial Transplantation on Transcriptomics in a Polymicrobial Sepsis Model

Seongmin Kim <sup>1,†</sup>, Ji Heon Noh <sup>2,†</sup>, Min Ji Lee <sup>3</sup>, Ye Jin Park <sup>3</sup>, Bo Mi Kim <sup>3</sup>, Yun-Seok Kim <sup>3</sup>, Sangik Hwang <sup>2</sup>, Chungoo Park <sup>1,\*</sup> and Kyuseok Kim <sup>3,\*</sup>

<sup>1</sup> School of Biological Science and Technology, Chonnam National University, Gwangju 61186, Republic of Korea; sgmn0223@gmail.com

<sup>2</sup> Department of Biochemistry, Chungnam National University, Daejeon 34134, Republic of Korea; journi@cnu.ac.kr (J.H.N.), hsi9740@naver.com (S.H.)

<sup>3</sup> Department of Emergency Medicine, CHA University School of Medicine, Seongnam 13497, Republic of Korea; minji.lee29@gmail.com (M.J.L.); yejin6577@naver.com (Y.J.P.); alfks4050@naver.com (B.M.K.); loupys@naver.com (Y.-S.K.)

\* Correspondence: chungoo@jnu.ac.kr (C.P.); dreinstein70@gmail.com or dremkks@cha.ac.kr (K.K.)

† These authors equally contributed to this work.

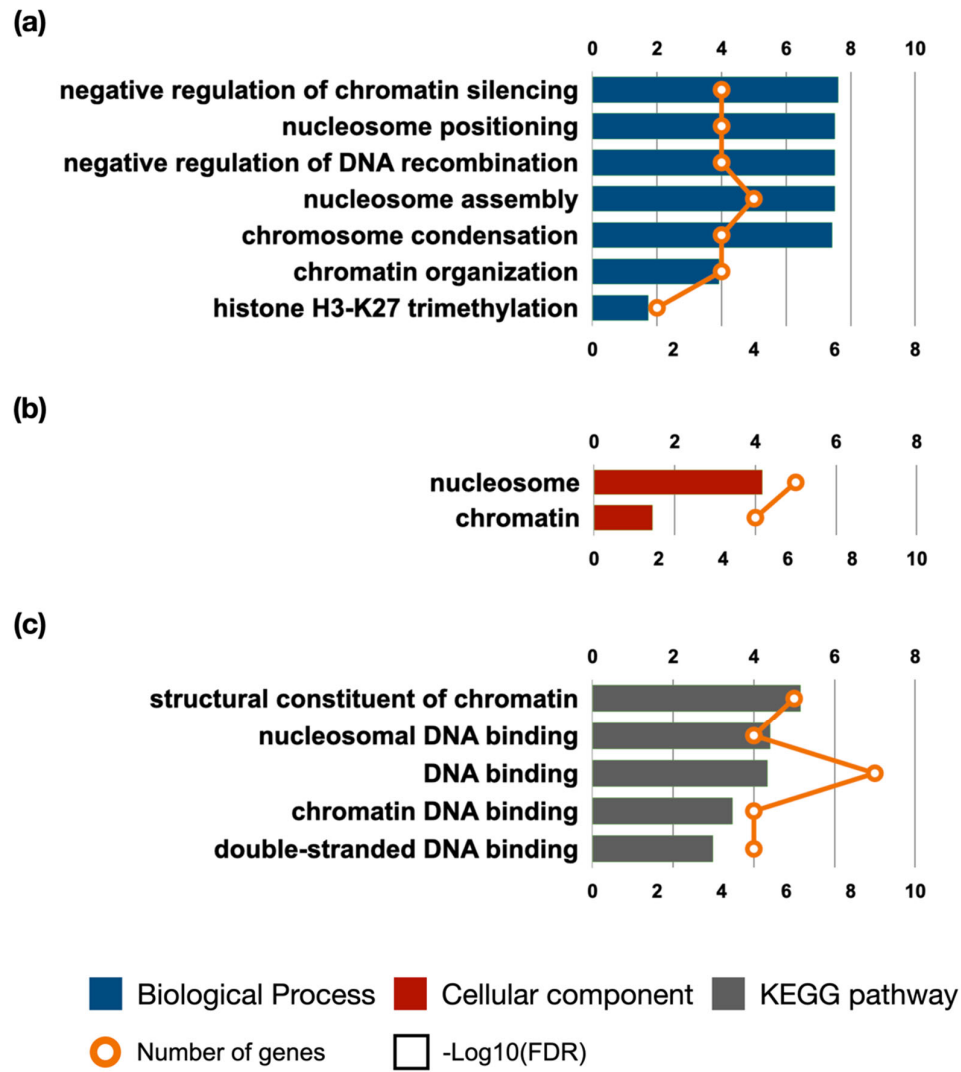

**Figure S1.** The significantly enriched Gene ontology (GO) biological process (a) and cellular component (b) categories and KEGG (c) pathways of 160 DEGs that were significantly upregulated in SEPSIS versus SEPSIS + MT.

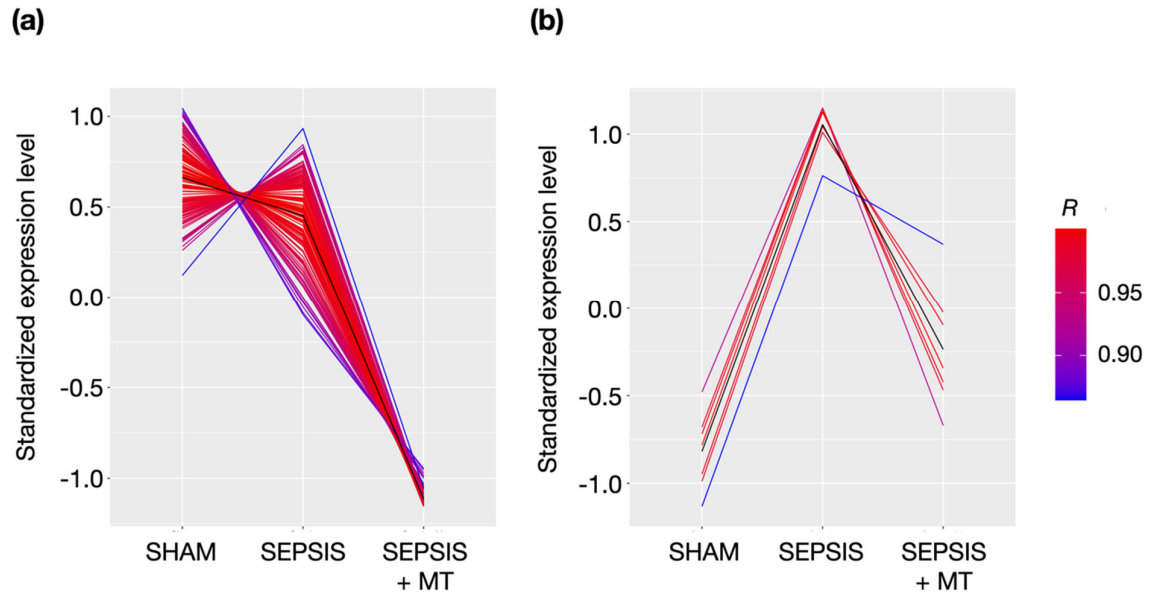

**Figure S2.** Trajectories of 160 DEGs expression change in three different groups. 153 genes were represented in cluster 1 (a) and the others (seven genes) were identified in cluster 2 (b). Black and other colored lines represent the centroid of clustered gene expression levels and each their own one, respectively. The gradient scale shows the value of Pearson's correlation coefficients ( $R$ ).

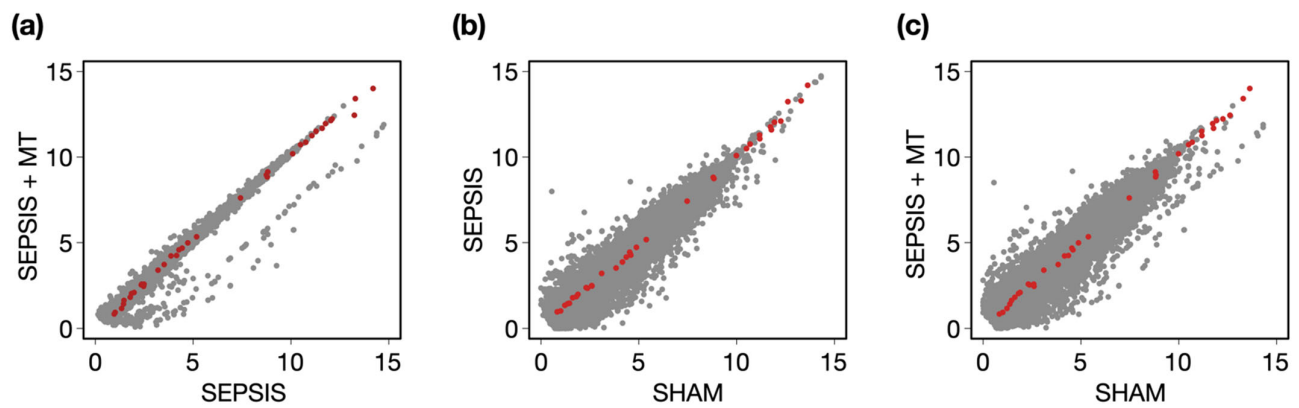

**Figure S3.** Scatter plots of RNA-seq data between SEPSIS and SEPSIS + MT (a), between SEPSIS and SHAM (b), and between SEPSIS + MT and SHAM (c). Red dot indicates the gene of mitochondrial genome.
